# Supplementary material
Source: PubMed Central journal article supplement (PMC4648330)

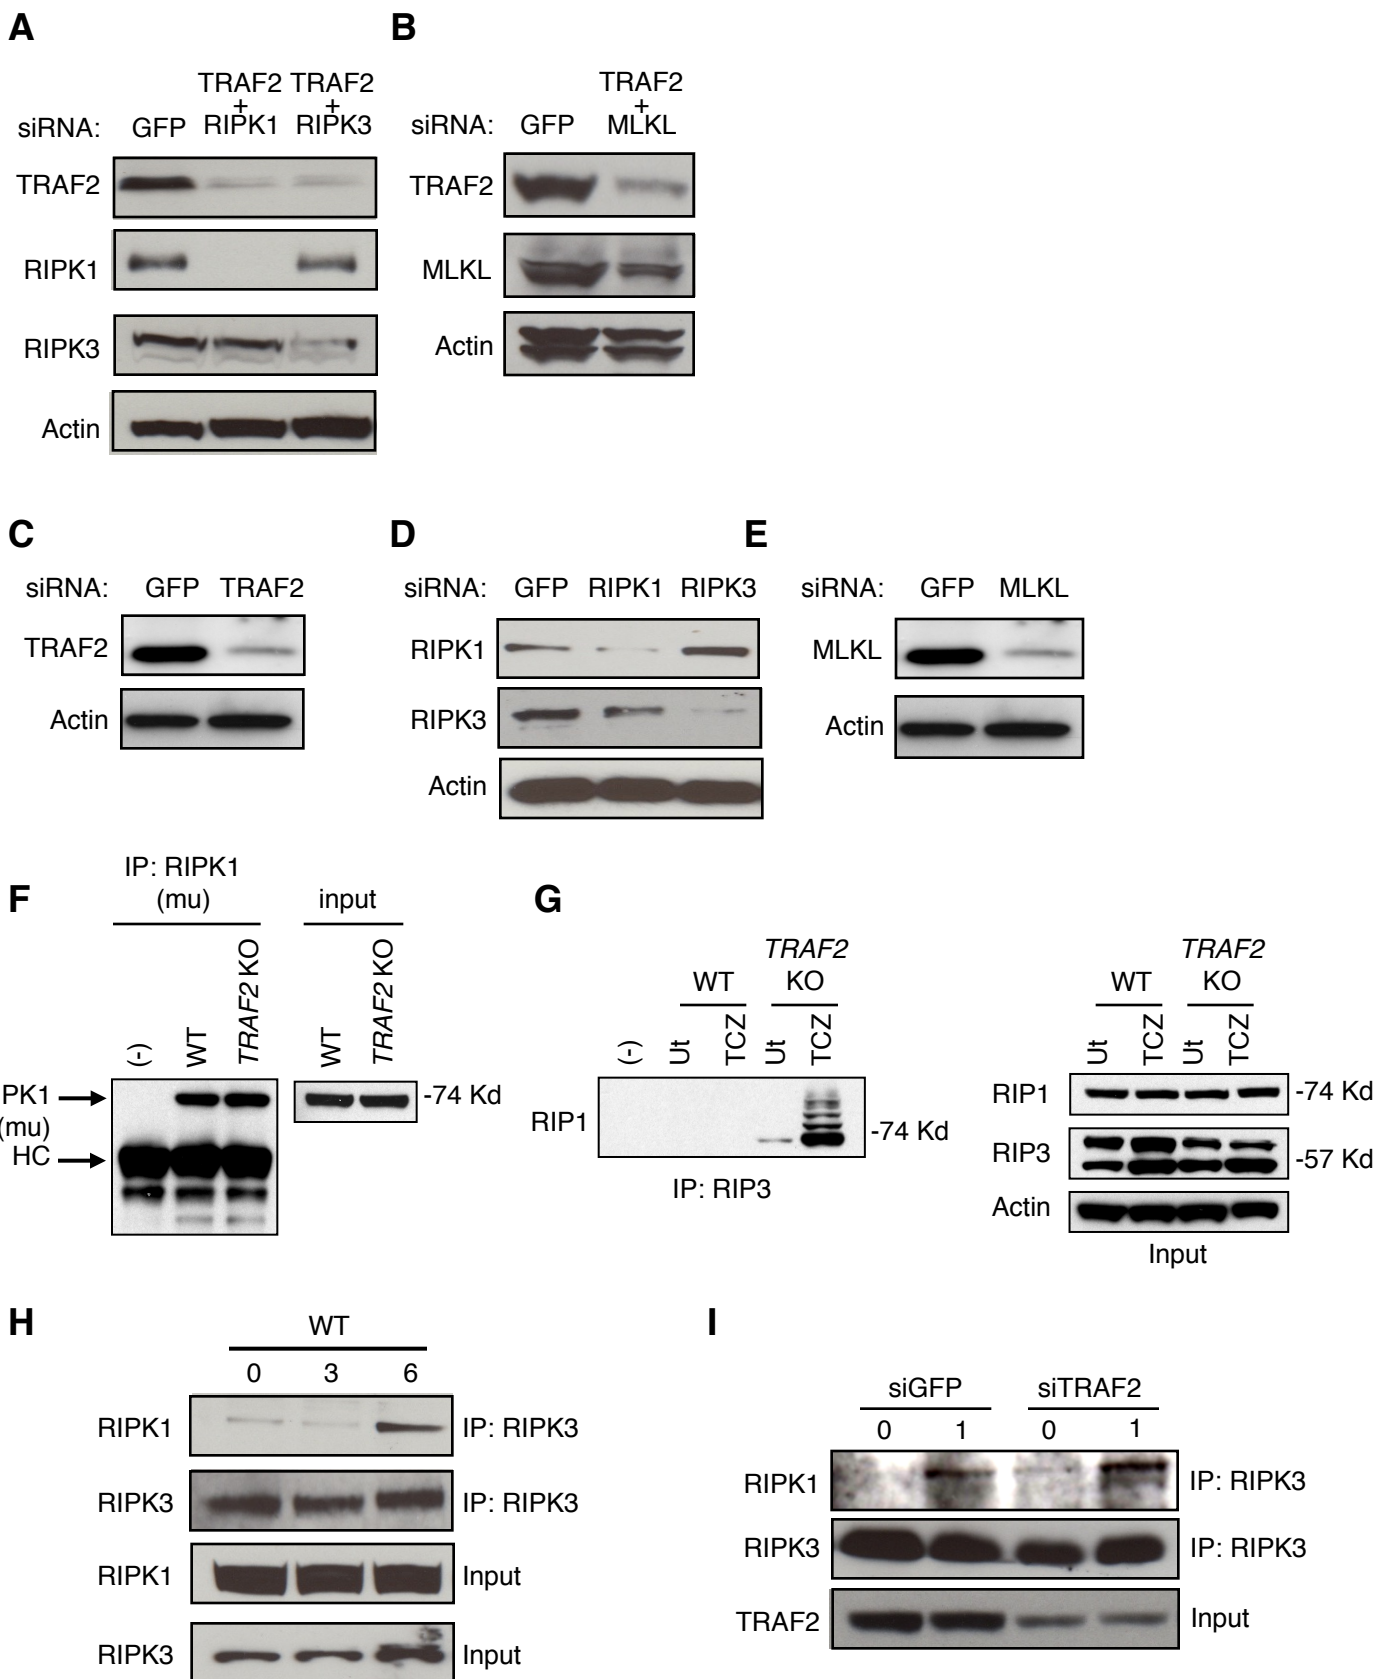

Supplement: cdd201535x1.pdf [file cdd201535x1.pdf]

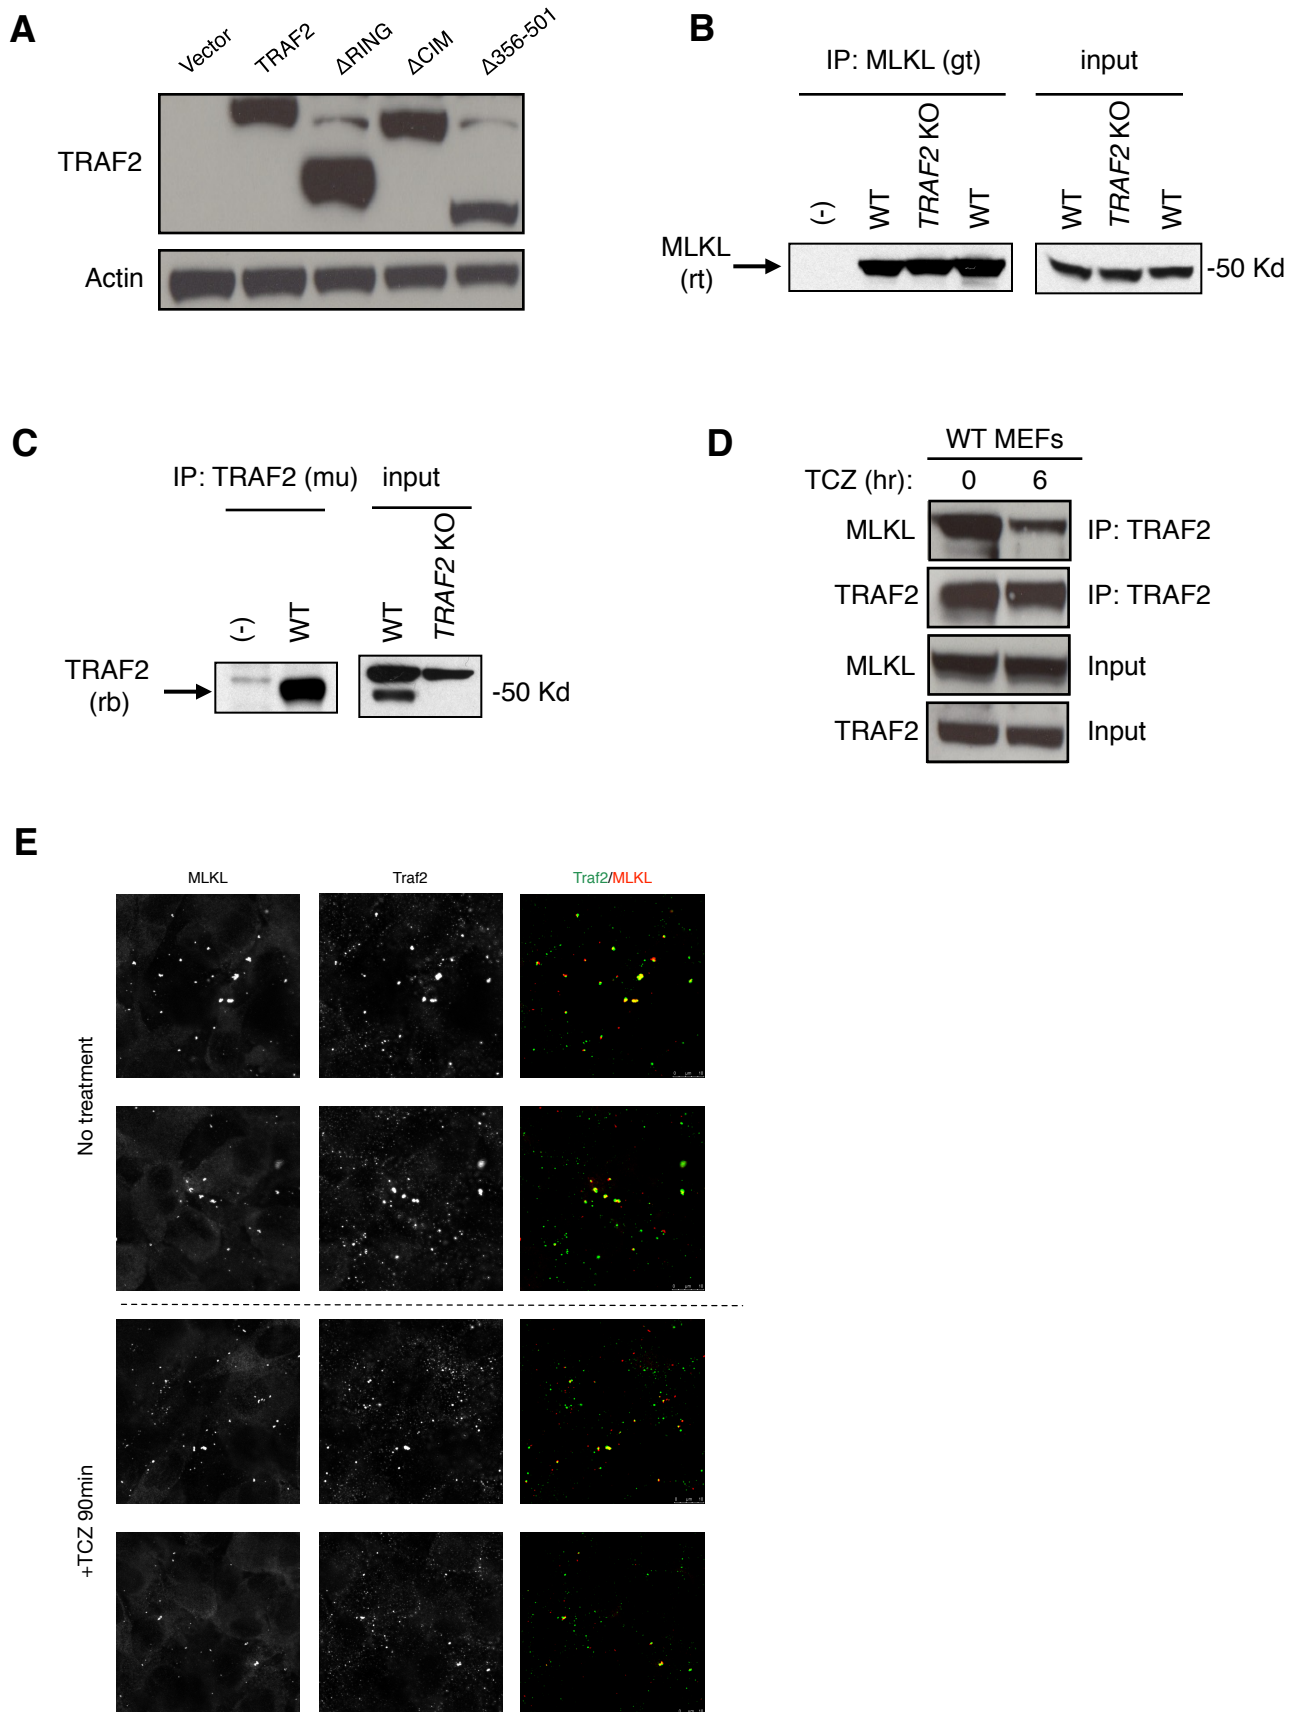

Supplement: cdd201535x2.pdf [file cdd201535x2.pdf]

**A**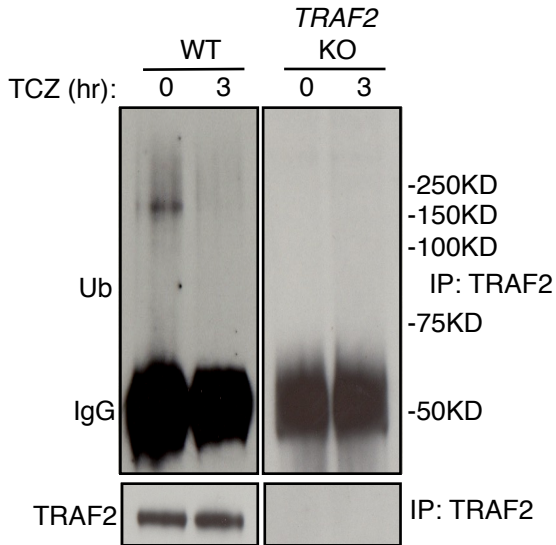**B**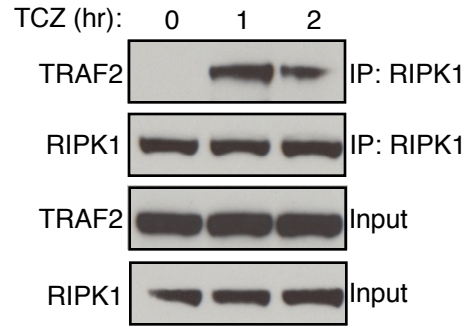**C**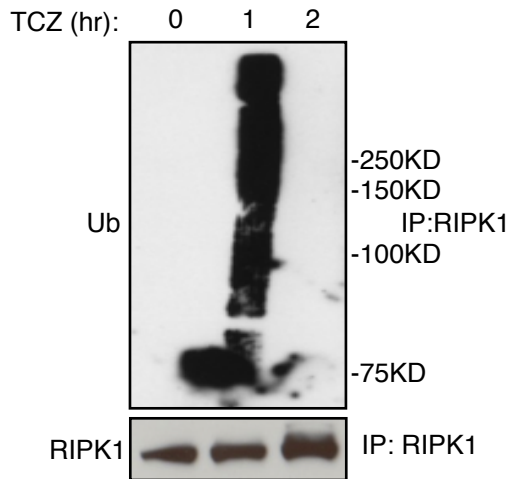**D**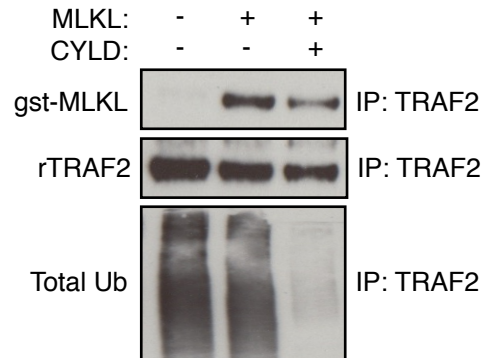

Supplement: cdd201535x3.pdf [file cdd201535x3.pdf]

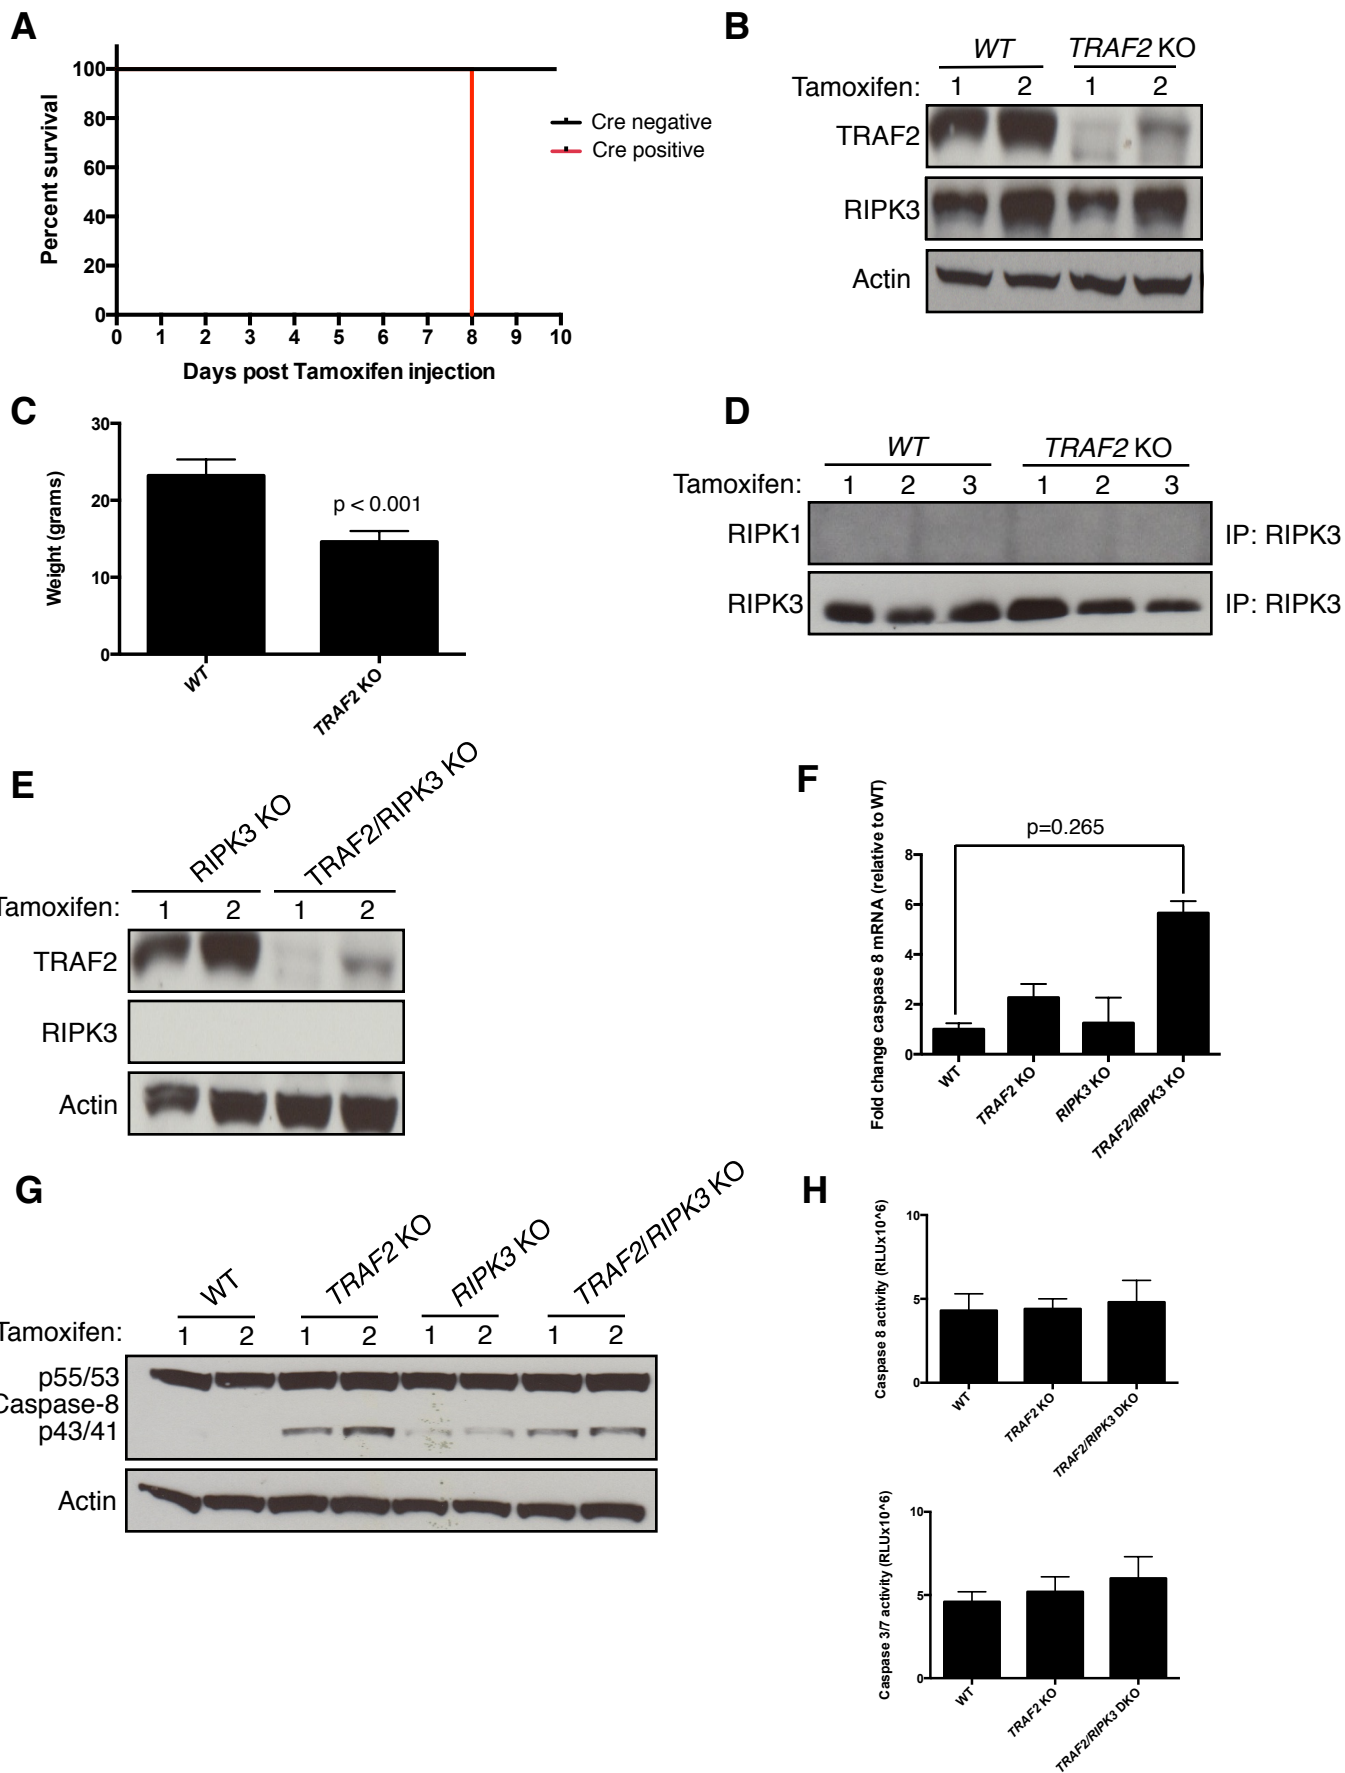

Supplemental Figure 4

Supplement: cdd201535x4.pdf [file cdd201535x4.pdf]

**A**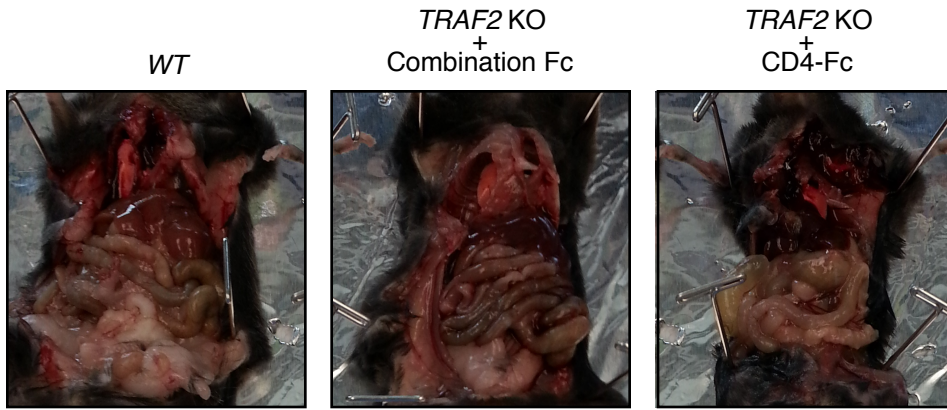**B**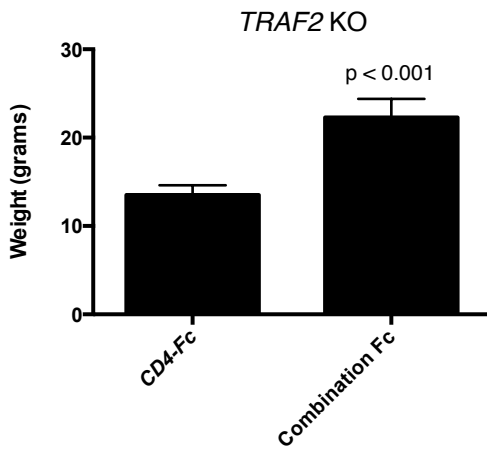**C**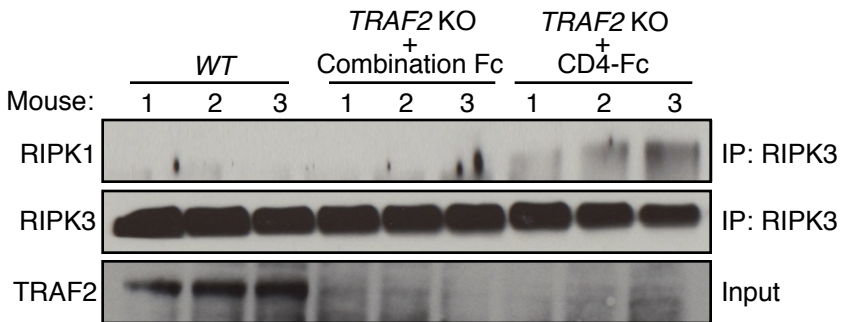

Supplement: cdd201535x5.pdf [file cdd201535x5.pdf]
